# Supplementary material for: Dietary sodium modulates nephropathy in Nedd4-2-deficient mice
Source: PubMed Central journal article supplement (PMC7244563; doi:10.1038/s41418-019-0468-5), 2019-12-04

## Supplementary Information

This document contains Supplementary Figure Legends and 4 supplementary figures (PDFs):

### Supplementary Figure Legends

**Supplementary Fig. 1.** H&E histology of *Nedd4-2<sup>Ksp1.3</sup>* kidney at P20 after high Na<sup>+</sup> diet.

**Supplementary Fig. 2:** High dietary Na<sup>+</sup> does not affect nephrogenesis in *Nedd4-2<sup>-/-</sup>* mice.

**Supplementary Fig. 3:** Changes in Nedd4-2 levels in response to varied Na<sup>+</sup> diet.

**Supplementary Fig. 4:** Changes in fetal ENaC levels in response to varied Na<sup>+</sup> diet.

## Supplementary Figure Legends

### Supplementary Fig. 1. H&E histology of *Nedd4-2<sup>Ksp1.3</sup>* kidney at P20 after high Na<sup>+</sup> diet.

Multifocal cortical areas of dysplasia with immature glomeruli (arrows) and dilated tubules (\*). Intervening areas of cortex are of normal morphology. Scale bar: 100  $\mu$ m.

### Supplementary Fig. 2: High dietary Na<sup>+</sup> does not affect nephrogenesis in *Nedd4-2<sup>-/-</sup>* mice

**a** Outline of salt feeding experiments. **b** Representative H&E images show no evidence of pathology in standard or high Na<sup>+</sup> fed E18.5 kidneys, with inset showing higher magnification. Scale bar: 0.5 mm, inset 100  $\mu$ m. **c** Picrosirius red staining reveals no fibrosis after either diet. Scale bar: 100  $\mu$ m. **d** qPCR for markers of kidney injury *collagen I (Col1a1)*, *vimentin* and *KIM-1* show no significant changes in mRNA levels (n = 4 mice per genotype). Data are shown as fold change from control on standard (Std.) diet, mean + SEM with significance calculated by a Student's t test (2 tailed).

### Supplementary Fig. 3: Changes in *Nedd4-2* levels in response to varied Na<sup>+</sup> diet.

**a** Semi-quantitative immunoblot analysis reveals higher expression of *Nedd4-2* (doublet showing two isoforms) in control and *Nedd4-2<sup>Ksp1.3</sup>* P20 kidneys after high Na<sup>+</sup> diet. As *Nedd4-2* is only ablated in cells expressing Ksp in the *Nedd4-2<sup>Ksp1.3</sup>* line, remaining *Nedd4-2* bands in *Nedd4-2<sup>Ksp1.3</sup>* samples are due to expression of this protein in regions of the kidney not driven by the Ksp promoter. **b** Levels from (a) quantitated as fold change from control standard diet, relative to  $\beta$ -actin expression. **c** Semi-quantitative immunoblot analysis reveals no change in *Nedd4-2* expression in control and *Nedd4-2<sup>Ksp1.3</sup>* P40 kidneys after low Na<sup>+</sup> diet. **d** Levels from (c) quantitated as fold change from control standard diet, relative to

$\beta$ -actin expression. n = 3, mean + SEM with significance calculated by a Student's t test (2 tailed). \*P<0.05.

**Supplementary Fig. 4: Changes in fetal ENaC levels in response to varied Na<sup>+</sup> diet.**

**a** Semi-quantitative immunoblot analysis reveals higher expression of mature ENaC subunits in *Nedd4-2<sup>-/-</sup>* kidneys at E18.5, under standard, high and low Na<sup>+</sup> diets. Expression levels quantitated in **b** as fold change from control standard diet, relative to  $\beta$ -actin expression. **c** Immunohistochemical staining of ENaC subunits reveals increased membrane localization in *Nedd4-2<sup>-/-</sup>* mice. Scale bar: 50  $\mu$ m. n = 3 (except for high Na<sup>+</sup> control where n = 2), mean + SEM with significance calculated by a Student's t test (2 tailed). \*P<0.05, \*\*P<0.01, \*\*\*P<0.005.

Supplementary Fig. 1.

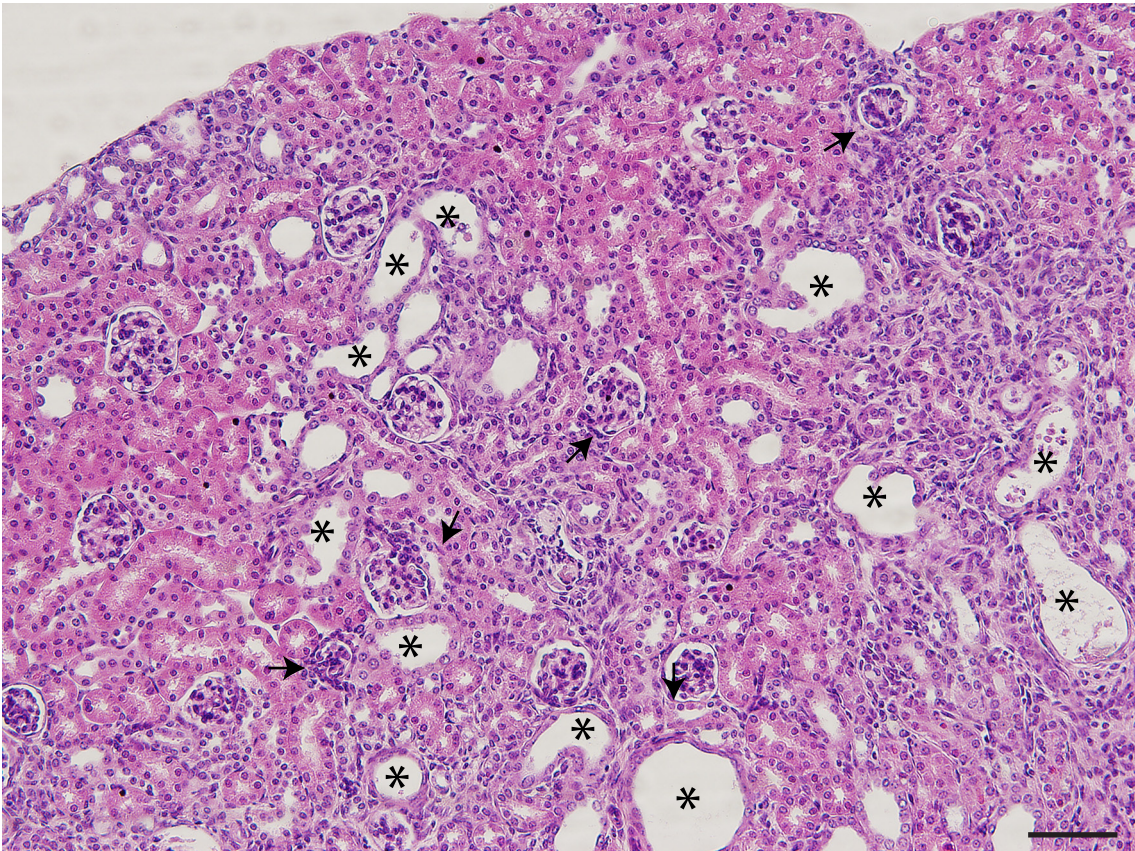

## Supplementary Fig. 2.

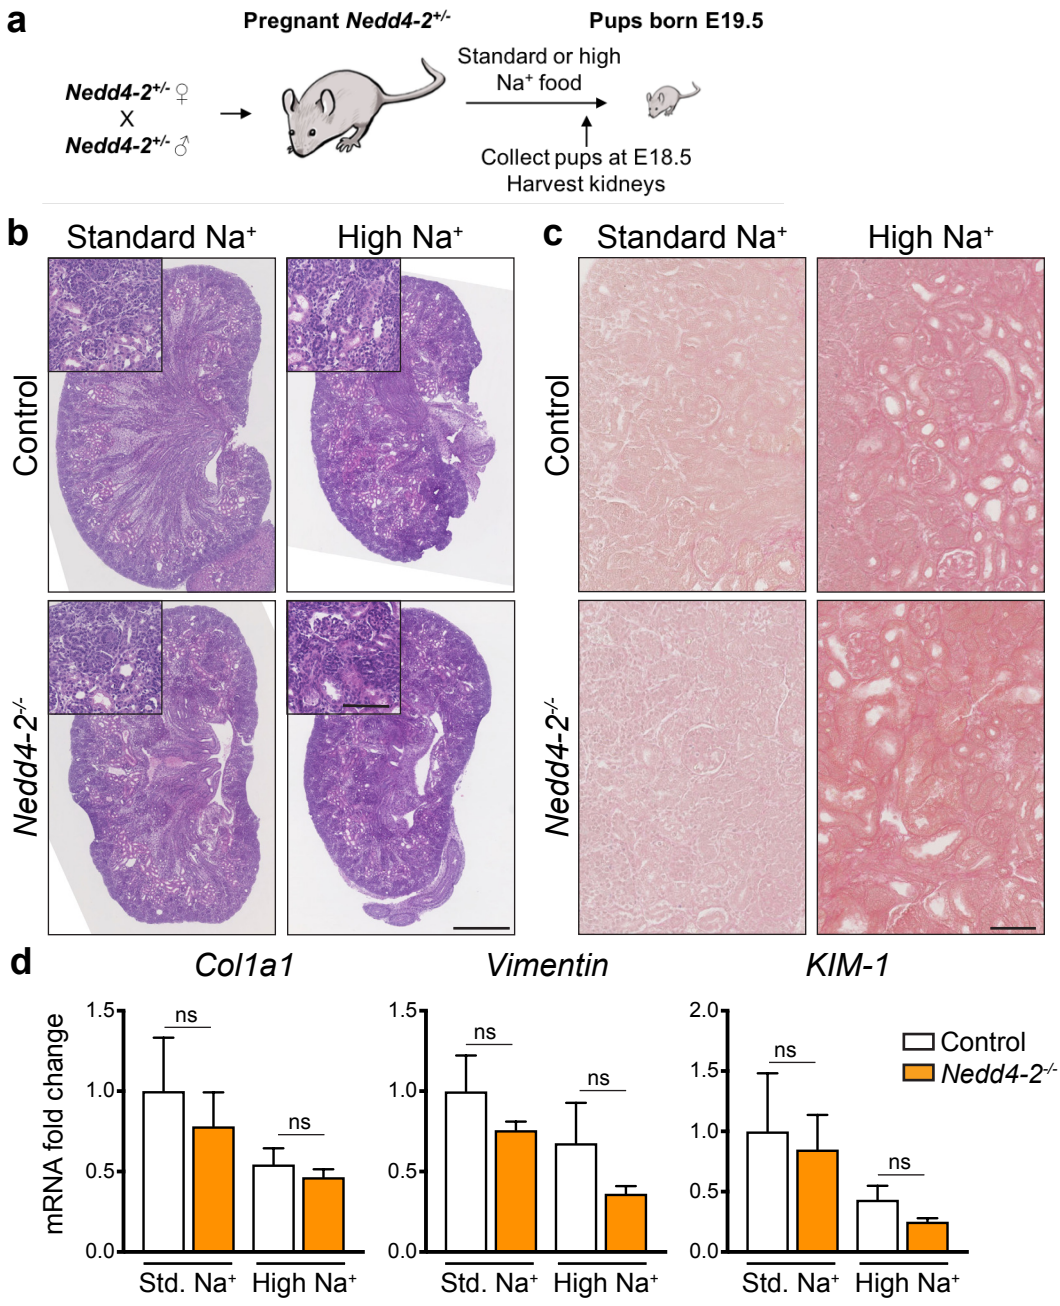

### Supplementary Fig. 3.

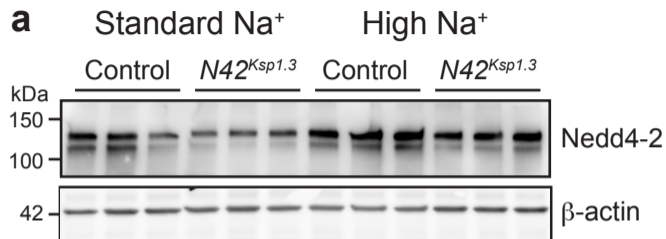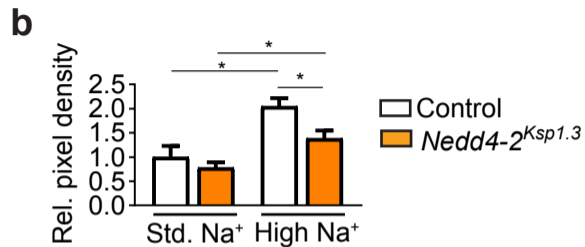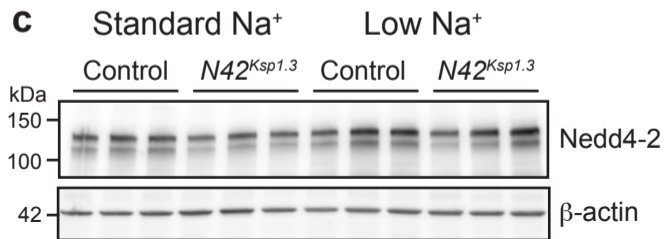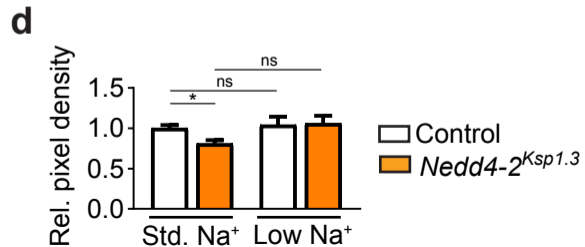

**Supplementary Fig. 4.**

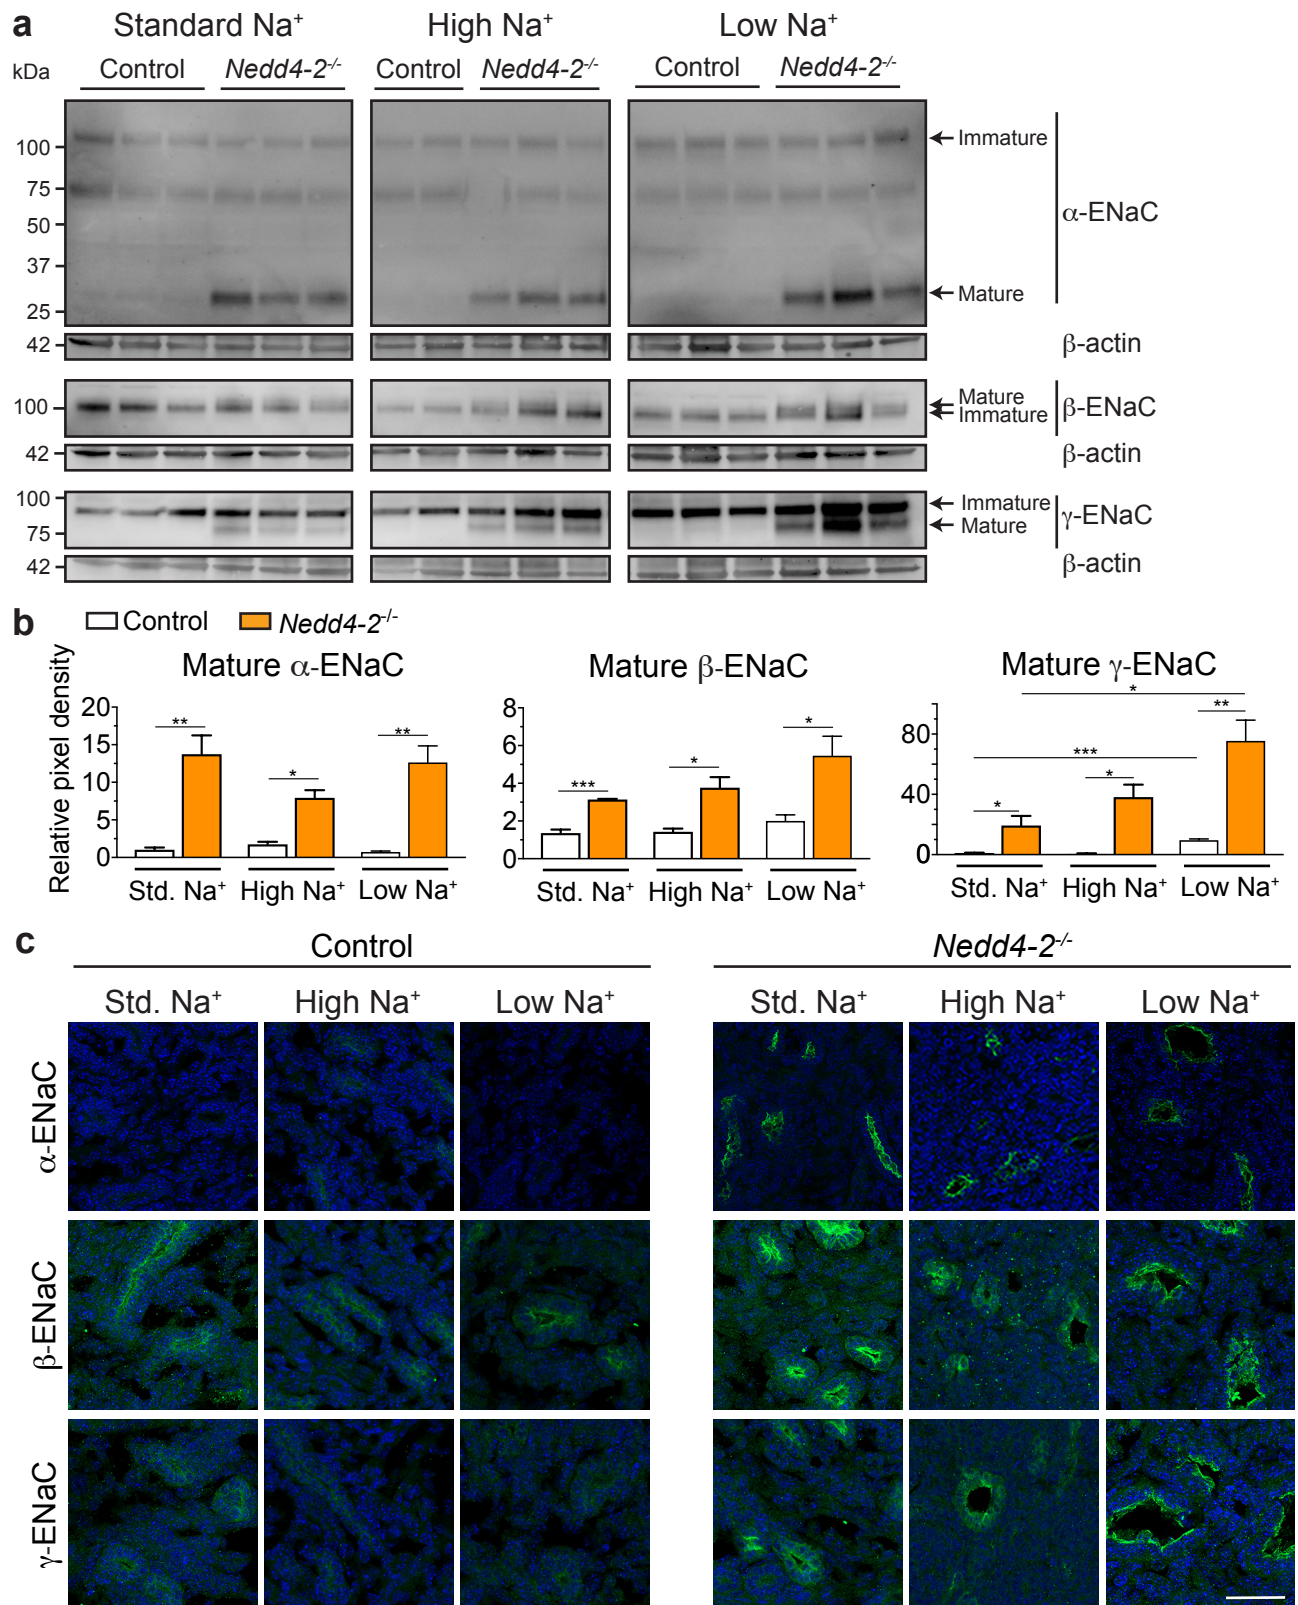

Supplement: 41418_2019_468_MOESM1_ESM.pdf [file 41418_2019_468_MOESM1_ESM.pdf]
